# Supplementary material
Source: MDPI journal article supplement (https://www.mdpi.com/2071-1050/15/1/521)
Supplement: s1 [file s1]

## ***Supporting information***

Xun Zhang <sup>a, b</sup>, Xianbin Zhu <sup>a, b, c, \*</sup>, Yufeng Ren <sup>c</sup>, Hongzhong Pan <sup>a, b</sup>, Huaming Yao <sup>c</sup>,  
Jiaming Wang <sup>b</sup>, Mingliang Liu <sup>b</sup>, Minghuang He <sup>b</sup>

<sup>a</sup> *Hubei Key Laboratory of Petroleum Geochemistry and Environment, Yangtze University, 430100 Wuhan, Hubei, PR China*

<sup>b</sup> *College of Resources and Environment, Yangtze University, 430100 Wuhan, Hubei, PR China*

<sup>c</sup> *Hubei Key Laboratory of Intelligent Yangtze and Hydroelectric Science, China Yangtze Power Co.,Ltd., Yichang, Hubei, 443000 Yichang, Hubei, PR China*

**Table S1** Observed richness (Sobs) and water quality parameters of water samples.

|                                            | A      | B       | C      | D      | E      | F      | G      | H      |
|--------------------------------------------|--------|---------|--------|--------|--------|--------|--------|--------|
| <b>Observed richness (SOBs)</b>            | 195    | 68      | 142    | 156    | 179    | 185    | 174    | 162    |
| <b>pH</b>                                  | 6.26   | 3.98    | 5.82   | 5.87   | 6.45   | 5.99   | 6.52   | 6.66   |
| <b>ORP (MV)</b>                            | -85.95 | -16.4   | -125.7 | -95.75 | -53.95 | -80    | -52.1  | -125.5 |
| <b>TDS (mg/L)</b>                          | 3748.5 | 2824    | 1958   | 1921.5 | 1149   | 1649.5 | 848    | 799.5  |
| <b>TN (mg/L)</b>                           | 18.03  | 23.27   | 12.84  | 13.03  | 24.03  | 24.68  | 22.03  | 3.25   |
| <b>NH<sub>4</sub><sup>+</sup>-N (mg/L)</b> | 13.69  | 13.68   | 10.08  | 9.56   | 4.04   | 12.14  | 0.66   | 0.64   |
| <b>NO<sub>3</sub><sup>-</sup>-N (mg/L)</b> | 1.33   | 5.08    | 1.56   | 1.27   | 0.58   | 0.93   | 0.43   | 0.36   |
| <b>NO<sub>2</sub><sup>-</sup>-N (mg/L)</b> | 0      | 0.67    | 0      | 0      | 0      | 0      | 0      | 0      |
| <b>SO<sub>4</sub><sup>2-</sup> (mg/L)</b>  | 42.9   | 21.7    | 40.6   | 78.5   | 42.14  | 57.4   | 104    | 2.8    |
| <b>TP (mg/L)</b>                           | 0.65   | 2.39    | 1.07   | 1.19   | 0.65   | 0.83   | 0.55   | 0.49   |
| <b>COD<sub>cr</sub> (mg/L)</b>             | 790.4  | 1111.04 | 379.36 | 279.36 | 513.76 | 237.12 | 158.08 | 39.52  |
| <b>DO (mg/L)</b>                           | 3.76   | 4.3     | 3.65   | 3.82   | 4.18   | 4.2    | 4.15   | 4.26   |
| <b>T (°C)</b>                              | 20.83  | 19.25   | 28.3   | 25.59  | 23.66  | 20.14  | 20.89  | 19.46  |
| <b>chromaticity</b>                        | 230.9  | 1138    | 1138   | 478    | 300.8  | 227.7  | 261.79 | 52.8   |

**Table S2 Reported the bacterial genera related to Mn and Fe cycle in the environment.**

| Elements | Types                         | Genus                            | Phylum                     | Reference | Sites ID (%) |      |      |       |      |      |       |       |
|----------|-------------------------------|----------------------------------|----------------------------|-----------|--------------|------|------|-------|------|------|-------|-------|
|          |                               |                                  |                            |           | A            | B    | C    | D     | E    | F    | G     | H     |
| Mn       | Mn(II)-oxidizing bacteria     | <i>Pseudomonas</i>               | <i>Proteobacteria</i>      | [1]       | 2.78         | 0.00 | 0.10 | 4.81  | 0.14 | 0.29 | 3.74  | 3.07  |
|          |                               | <i>Paracoccus</i>                | <i>Proteobacteria</i>      | [2]       | 0.14         | 0.00 | 0.00 | 0.00  | 0.00 | 0.00 | 0.01  | 0.01  |
|          |                               | <i>Aeromonas</i>                 | <i>Proteobacteria</i>      | [3]       | 0.33         | 0.04 | 0.04 | 0.03  | 0.03 | 0.10 | 0.10  | 0.05  |
|          |                               | <i>Acinetobacter</i>             | <i>Proteobacteria</i>      | [1]       | 34.27        | 0.01 | 4.00 | 12.29 | 5.18 | 2.34 | 29.66 | 33.95 |
|          |                               | <i>Bosea</i>                     | <i>Proteobacteria</i>      | [4]       | 0.01         | 0.00 | 0.00 | 0.00  | 0.00 | 0.00 | 0.08  | 0.04  |
|          |                               | <i>Fusobacterium</i>             | <i>Fusobacteria</i>        | [5]       | 0.00         | 0.00 | 0.00 | 0.00  | 0.01 | 0.00 | 0.00  | 0.00  |
|          |                               | <i>Deinococcus</i>               | <i>Deinococcus-Thermus</i> | [6]       | 0.01         | 0.00 | 0.00 | 0.00  | 0.00 | 0.00 | 0.00  | 0.02  |
|          |                               | <i>Flavobacterium</i>            | <i>Bacteroidetes</i>       | [7]       | 6.75         | 0.00 | 0.85 | 0.39  | 0.67 | 0.04 | 3.41  | 2.30  |
|          | Composite-functional bacteria | <i>Geobacter</i>                 | <i>Proteobacteria</i>      | [8]       | 0.00         | 0.00 | 0.00 | 0.00  | 0.02 | 0.26 | 0.02  | 0.00  |
|          |                               | <i>Shewanella</i>                | <i>Proteobacteria</i>      | [9, 10]   | 0.09         | 0.00 | 0.00 | 0.00  | 0.00 | 0.01 | 0.05  | 0.01  |
|          |                               | <i>Bacillus</i>                  | <i>Firmicutes</i>          | [11, 12]  | 0.04         | 0.00 | 0.00 | 0.00  | 0.00 | 0.02 | 0.01  | 0.03  |
|          | Mn(IV)-reducing bacteria      | <i>Rhodferax</i>                 | <i>Proteobacteria</i>      | [13]      | 0.22         | 0.00 | 5.11 | 0.02  | 6.63 | 0.00 | 1.37  | 0.49  |
|          |                               | <i>Sulfurospirillum</i>          | <i>Proteobacteria</i>      | [14]      | 0.00         | 0.20 | 1.67 | 1.84  | 1.83 | 1.47 | 0.59  | 0.12  |
| Fe       | Fe(II)-oxidizing bacteria     | <i>Pseudomonas</i>               | <i>Proteobacteria</i>      | [15]      | 2.78         | 0.00 | 0.10 | 4.81  | 0.14 | 0.29 | 3.74  | 3.07  |
|          |                               | <i>Thermomonas</i>               | <i>Proteobacteria</i>      | [16]      | 0.65         | 0.00 | 0.00 | 0.00  | 0.00 | 0.00 | 0.01  | 0.01  |
|          |                               | <i>Dechloromonas</i>             | <i>Proteobacteria</i>      | [17]      | 0.10         | 0.00 | 0.13 | 0.28  | 0.10 | 0.10 | 0.23  | 0.12  |
|          |                               | <i>Aquabacterium</i>             | <i>Proteobacteria</i>      | [18]      | 0.55         | 0.00 | 0.07 | 0.06  | 0.03 | 0.01 | 0.26  | 0.16  |
|          |                               | <i>Acidovorax</i>                | <i>Proteobacteria</i>      | [18]      | 5.22         | 0.00 | 0.11 | 0.25  | 0.14 | 0.16 | 0.45  | 0.37  |
|          |                               | <i>Hyphomonas</i>                | <i>Proteobacteria</i>      | [19]      | 0.00         | 0.00 | 0.00 | 0.00  | 0.00 | 0.00 | 0.04  | 0.01  |
|          |                               | <i>Paracoccus</i>                | <i>Proteobacteria</i>      | [18]      | 0.14         | 0.00 | 0.00 | 0.00  | 0.00 | 0.00 | 0.01  | 0.01  |
|          |                               | <i>Geobacter</i>                 | <i>Proteobacteria</i>      | [18]      | 0.00         | 0.00 | 0.00 | 0.00  | 0.02 | 0.26 | 0.02  | 0.00  |
|          | Fe(III)-reducing bacteria     | <i>Desulfovibrio</i>             | <i>Proteobacteria</i>      | [20]      | 0.03         | 0.00 | 0.30 | 0.68  | 0.36 | 0.49 | 0.15  | 0.18  |
|          |                               | <i>Desulfobulbus</i>             | <i>Proteobacteria</i>      | [21]      | 0.00         | 0.00 | 0.08 | 0.14  | 0.40 | 1.52 | 0.08  | 0.00  |
|          |                               | <i>Shewanella</i>                | <i>Proteobacteria</i>      | [9]       | 0.09         | 0.00 | 0.00 | 0.00  | 0.00 | 0.01 | 0.05  | 0.01  |
|          |                               | <i>Aeromonas</i>                 | <i>Proteobacteria</i>      | [22]      | 0.33         | 0.04 | 0.04 | 0.03  | 0.03 | 0.10 | 0.10  | 0.05  |
|          |                               | <i>Rhodferax</i>                 | <i>Proteobacteria</i>      | [13]      | 0.22         | 0.00 | 5.11 | 0.02  | 6.63 | 0.00 | 1.37  | 0.49  |
|          |                               | <i>Sulfurospirillum</i>          | <i>Proteobacteria</i>      | [22]      | 0.01         | 0.20 | 1.67 | 1.84  | 1.83 | 1.47 | 0.59  | 0.12  |
|          |                               | <i>Clostridium sensu stricto</i> | <i>Firmicutes</i>          | [23]      | 0.10         | 0.35 | 0.25 | 0.47  | 0.43 | 8.36 | 0.08  | 0.12  |
|          |                               | <i>Desulfosporosinus</i>         | <i>Firmicutes</i>          | [24]      | 0.01         | 0.00 | 0.00 | 0.00  | 0.00 | 0.00 | 0.00  | 0.00  |
|          |                               | <i>Bacillus</i>                  | <i>Firmicutes</i>          | [22]      | 0.04         | 0.00 | 0.00 | 0.00  | 0.00 | 0.02 | 0.01  | 0.03  |
|          |                               | <i>Anaeromusa</i>                | <i>Firmicutes</i>          | [21]      | 0.01         | 0.00 | 0.41 | 1.38  | 0.69 | 2.23 | 0.04  | 0.09  |
|          |                               | <i>Anaeroarcus</i>               |                            |           |              |      |      |       |      |      |       |       |

**Table S3 Reported the bacterial genera related to S cycle in the environment.**

| Types                                | Genus                            | Phylum                | Reference | Site (%) |      |      |       |      |      |       |       |
|--------------------------------------|----------------------------------|-----------------------|-----------|----------|------|------|-------|------|------|-------|-------|
|                                      |                                  |                       |           | A        | B    | C    | D     | E    | F    | G     | H     |
| <b>S-oxidizing bacteria</b>          | <i>Acinetobacter</i>             | <i>Proteobacteria</i> | [25]      | 34.27    | 0.01 | 4.00 | 12.29 | 5.18 | 2.34 | 29.66 | 33.95 |
|                                      | <i>Allochromatium</i>            | <i>Proteobacteria</i> | [26]      | 0.01     | 0.00 | 0.00 | 0.00  | 0.00 | 0.01 | 0.00  | 0.00  |
|                                      | <i>Azoarcus</i>                  | <i>Proteobacteria</i> | [27]      | 0.09     | 0.00 | 0.01 | 0.01  | 0.00 | 0.01 | 0.01  | 0.00  |
|                                      | <i>Beggiatoa</i>                 | <i>Proteobacteria</i> | [21]      | 0.00     | 0.00 | 0.00 | 0.00  | 0.00 | 0.06 | 0.00  | 0.00  |
|                                      | <i>Bosea</i>                     | <i>Proteobacteria</i> | [21]      | 0.01     | 0.00 | 0.00 | 0.00  | 0.00 | 0.00 | 0.08  | 0.04  |
|                                      | <i>Burkholderia</i>              | <i>Proteobacteria</i> | [28]      | 0.00     | 0.00 | 0.00 | 0.00  | 0.00 | 0.00 | 0.00  | 0.01  |
|                                      | <i>Candidatus_Thiobios</i>       | <i>Proteobacteria</i> | [29]      | 0.02     | 0.00 | 0.00 | 0.00  | 0.00 | 0.00 | 0.00  | 0.00  |
|                                      | <i>Chromatium</i>                | <i>Proteobacteria</i> | [29]      | 0.00     | 0.00 | 0.00 | 0.00  | 0.00 | 0.02 | 0.01  | 0.00  |
|                                      | <i>Paracoccus</i>                | <i>Proteobacteria</i> | [21]      | 0.14     | 0.00 | 0.00 | 0.00  | 0.00 | 0.00 | 0.01  | 0.01  |
|                                      | <i>Pseudomonas</i>               | <i>Proteobacteria</i> | [30]      | 2.78     | 0.00 | 0.10 | 4.81  | 0.14 | 0.29 | 3.74  | 3.07  |
|                                      | <i>Sulfuricurvum</i>             | <i>Proteobacteria</i> | [31]      | 0.01     | 0.00 | 0.06 | 0.46  | 0.04 | 0.85 | 0.02  | 0.00  |
|                                      | <i>Sulfurimonas</i>              | <i>Proteobacteria</i> | [32]      | 0.00     | 0.05 | 0.29 | 0.24  | 0.53 | 0.82 | 0.02  | 0.00  |
|                                      | <i>Thiocapsa</i>                 | <i>Proteobacteria</i> | [33]      | 0.01     | 0.00 | 0.00 | 0.00  | 0.00 | 0.01 | 0.00  | 0.01  |
|                                      | <i>Thioclava</i>                 | <i>Proteobacteria</i> | [8]       | 0.10     | 0.00 | 0.00 | 0.00  | 0.00 | 0.00 | 0.00  | 0.00  |
|                                      | <i>Thiothrix</i>                 | <i>Proteobacteria</i> | [34]      | 1.21     | 0.00 | 0.00 | 0.00  | 0.00 | 0.00 | 0.00  | 0.00  |
| <b>Composite-functional bacteria</b> | <i>Bacillus</i>                  | <i>Firmicutes</i>     | [35, 36]  | 0.04     | 0.00 | 0.00 | 0.00  | 0.00 | 0.02 | 0.01  | 0.03  |
|                                      | <i>Dechloromonas</i>             | <i>Proteobacteria</i> | [17, 37]  | 0.10     | 0.00 | 0.13 | 0.28  | 0.10 | 0.10 | 0.23  | 0.12  |
|                                      | <i>Sulfurospirillum</i>          | <i>Proteobacteria</i> | [38, 39]  | 0.01     | 0.20 | 1.67 | 1.84  | 1.83 | 1.47 | 0.59  | 0.12  |
|                                      | <i>Sulfurovum</i>                | <i>Proteobacteria</i> | [40, 41]  | 0.01     | 0.00 | 0.00 | 0.00  | 0.00 | 0.00 | 0.00  | 0.00  |
| <b>S-reducing bacteria</b>           | <i>Clostridium sensu stricto</i> | <i>Firmicutes</i>     | [21]      | 0.10     | 0.35 | 0.25 | 0.47  | 0.43 | 8.36 | 0.08  | 0.12  |
|                                      | <i>Desulfobacter</i>             | <i>Proteobacteria</i> | [21]      | 0.00     | 0.00 | 0.00 | 0.00  | 0.00 | 0.01 | 0.00  | 0.00  |
|                                      | <i>Desulfobacterium</i>          | <i>Proteobacteria</i> | [21]      | 0.00     | 0.00 | 0.00 | 0.00  | 0.00 | 0.01 | 0.01  | 0.00  |
|                                      | <i>Desulfobulbus</i>             | <i>Proteobacteria</i> | [42]      | 0.00     | 0.00 | 0.08 | 0.14  | 0.40 | 1.52 | 0.08  | 0.00  |
|                                      | <i>Desulfomicrobium</i>          | <i>Proteobacteria</i> | [43]      | 0.00     | 0.00 | 0.02 | 0.03  | 0.03 | 0.10 | 0.09  | 0.07  |
|                                      | <i>Desulfomonile</i>             | <i>Proteobacteria</i> | [21]      | 0.01     | 0.00 | 0.00 | 0.00  | 0.00 | 0.00 | 0.00  | 0.00  |
|                                      | <i>Desulfosporosinus</i>         | <i>Firmicutes</i>     | [24]      | 0.01     | 0.00 | 0.00 | 0.00  | 0.00 | 0.00 | 0.00  | 0.00  |
|                                      | <i>Desulfovibrio</i>             | <i>Proteobacteria</i> | [20]      | 0.03     | 0.00 | 0.30 | 0.68  | 0.36 | 0.49 | 0.15  | 0.18  |
|                                      | <i>Fusibacter</i>                | <i>Firmicutes</i>     | [21]      | 0.00     | 0.00 | 0.08 | 0.03  | 0.04 | 0.17 | 0.15  | 0.07  |
|                                      | <i>Geobacter</i>                 | <i>Proteobacteria</i> | [44]      | 0.00     | 0.00 | 0.00 | 0.00  | 0.02 | 0.26 | 0.02  | 0.00  |
|                                      | <i>Shewanella</i>                | <i>Proteobacteria</i> | [45]      | 0.09     | 0.00 | 0.00 | 0.00  | 0.00 | 0.01 | 0.05  | 0.01  |

**Table S4 Reported the bacterial genera related to C cycle in the environment.**

| Types                                    | Genus                        | Phylum                   | Reference | Sites (ID) |      |      |       |      |      |       |       |
|------------------------------------------|------------------------------|--------------------------|-----------|------------|------|------|-------|------|------|-------|-------|
|                                          |                              |                          |           | A          | B    | C    | D     | E    | F    | G     | H     |
| Aerobic<br>Chemo-<br>Heterotro-<br>-phic | <i>Acetobacter</i>           | <i>Proteobacteria</i>    | [46]      | 0.00       | 0.35 | 0.00 | 0.00  | 0.00 | 0.00 | 0.00  | 0.00  |
|                                          | <i>Acidovorax</i>            | <i>Proteobacteria</i>    | [46]      | 5.22       | 0.00 | 0.11 | 0.25  | 0.14 | 0.16 | 0.45  | 0.37  |
|                                          | <i>Acinetobacter</i>         | <i>Proteobacteria</i>    | [46]      | 34.27      | 0.01 | 4.00 | 12.29 | 5.18 | 2.34 | 29.66 | 33.95 |
|                                          | <i>Aeromicrobium</i>         | <i>Actinobacteriota</i>  | [46]      | 0.00       | 0.00 | 0.00 | 0.00  | 0.00 | 0.00 | 0.00  | 0.02  |
|                                          | <i>Algoriphagus</i>          | <i>Bacteroidota</i>      | [46]      | 0.00       | 0.00 | 0.00 | 0.00  | 0.00 | 0.00 | 0.01  | 0.00  |
|                                          | <i>Altererythrobacter</i>    | <i>Proteobacteria</i>    | [46]      | 0.00       | 0.00 | 0.00 | 0.00  | 0.00 | 0.00 | 0.01  | 0.00  |
|                                          | <i>Arenimonas</i>            | <i>Proteobacteria</i>    | [47]      | 1.53       | 0.00 | 0.00 | 0.01  | 0.00 | 0.00 | 0.07  | 0.02  |
|                                          | <i>Azoarcus</i>              | <i>Proteobacteria</i>    | [48]      | 0.09       | 0.00 | 0.01 | 0.01  | 0.00 | 0.01 | 0.01  | 0.00  |
|                                          | <i>Bosea</i>                 | <i>Proteobacteria</i>    | [46]      | 0.01       | 0.00 | 0.00 | 0.00  | 0.00 | 0.00 | 0.08  | 0.04  |
|                                          | <i>Caulobacter</i>           | <i>Proteobacteria</i>    | [49]      | 0.01       | 0.00 | 0.00 | 0.00  | 0.00 | 0.00 | 0.05  | 0.03  |
|                                          | <i>Chryseobacterium</i>      | <i>Bacteroidota</i>      | [46]      | 0.03       | 0.00 | 0.00 | 0.00  | 0.00 | 0.00 | 0.10  | 0.59  |
|                                          | <i>Dechloromonas</i>         | <i>Proteobacteria</i>    | [46]      | 0.10       | 0.00 | 0.13 | 0.28  | 0.10 | 0.10 | 0.23  | 0.12  |
|                                          | <i>Devosia</i>               | <i>Proteobacteria</i>    | [50]      | 0.02       | 0.00 | 0.00 | 0.00  | 0.00 | 0.00 | 0.01  | 0.00  |
|                                          | <i>Ferruginibacter</i>       | <i>Bacteroidota</i>      | [51]      | 0.03       | 0.00 | 0.00 | 0.00  | 0.00 | 0.00 | 0.00  | 0.00  |
|                                          | <i>Filomicrobium</i>         | <i>Proteobacteria</i>    | [50]      | 0.01       | 0.00 | 0.00 | 0.00  | 0.00 | 0.00 | 0.00  | 0.00  |
|                                          | <i>Haliscomenobacter</i>     | <i>Bacteroidota</i>      | [44]      | 0.01       | 0.00 | 0.00 | 0.00  | 0.00 | 0.00 | 0.00  | 0.00  |
|                                          | <i>Hyphomonas</i>            | <i>Proteobacteria</i>    | [52]      | 0.00       | 0.00 | 0.00 | 0.00  | 0.00 | 0.00 | 0.04  | 0.01  |
|                                          | <i>Legionella</i>            | <i>Proteobacteria</i>    | [46]      | 0.03       | 0.00 | 0.00 | 0.00  | 0.00 | 0.00 | 0.00  | 0.00  |
|                                          | <i>Leucobacter</i>           | <i>Actinobacteriota</i>  | [46]      | 0.01       | 0.00 | 0.00 | 0.00  | 0.00 | 0.00 | 0.00  | 0.00  |
|                                          | <i>Lewinella</i>             | <i>Bacteroidota</i>      | [46]      | 0.01       | 0.00 | 0.00 | 0.00  | 0.00 | 0.00 | 0.00  | 0.00  |
|                                          | <i>Lutibacter</i>            | <i>Bacteroidota</i>      | [46]      | 0.00       | 0.00 | 0.00 | 0.00  | 0.00 | 0.00 | 0.01  | 0.00  |
|                                          | <i>Microbacterium</i>        | <i>Actinobacteriota</i>  | [46]      | 0.01       | 0.00 | 0.00 | 0.00  | 0.00 | 0.00 | 0.01  | 0.05  |
|                                          | <i>Mycobacterium</i>         | <i>Actinobacteriota</i>  | [53]      | 1.91       | 0.00 | 0.01 | 0.04  | 0.04 | 0.19 | 1.72  | 7.91  |
|                                          | <i>Norank</i>                | <i>Verrucomicrobiota</i> | [46]      | 0.11       | 0.00 | 0.00 | 0.01  | 0.00 | 0.00 | 0.00  | 0.00  |
|                                          | <i>f Verrucomicrobiaceae</i> |                          |           |            |      |      |       |      |      |       |       |
|                                          | <i>Novosphingobium</i>       | <i>Proteobacteria</i>    | [46]      | 1.04       | 0.00 | 0.05 | 0.00  | 0.03 | 0.04 | 0.07  | 0.00  |
|                                          | <i>Paracoccus</i>            | <i>Proteobacteria</i>    | [46]      | 0.14       | 0.00 | 0.00 | 0.00  | 0.00 | 0.00 | 0.01  | 0.01  |
|                                          | <i>Pedobacter</i>            | <i>Bacteroidota</i>      | [46]      | 0.21       | 0.00 | 0.00 | 0.00  | 0.00 | 0.00 | 0.03  | 0.03  |
|                                          | <i>Polymorphobacter</i>      | <i>Proteobacteria</i>    | [46]      | 0.03       | 0.00 | 0.00 | 0.00  | 0.00 | 0.00 | 0.00  | 0.00  |
|                                          | <i>Porphyrobacter</i>        | <i>Proteobacteria</i>    | [46]      | 0.04       | 0.00 | 0.02 | 0.00  | 0.02 | 0.00 | 0.01  | 0.00  |
|                                          | <i>Prostheco bacter</i>      | <i>Verrucomicrobiota</i> | [46]      | 0.03       | 0.00 | 0.00 | 0.00  | 0.00 | 0.00 | 0.00  | 0.00  |
|                                          | <i>Pseudohongiella</i>       | <i>Proteobacteria</i>    | [46]      | 0.01       | 0.00 | 0.00 | 0.00  | 0.00 | 0.00 | 0.00  | 0.00  |
|                                          | <i>Pseudomonas</i>           | <i>Proteobacteria</i>    | [46]      | 2.78       | 0.00 | 0.10 | 4.81  | 0.14 | 0.29 | 3.74  | 3.07  |
|                                          | <i>Psychrobacter</i>         | <i>Proteobacteria</i>    | [46]      | 0.00       | 0.00 | 0.01 | 0.00  | 0.01 | 0.01 | 0.05  | 0.16  |
|                                          | <i>Reyranella</i>            | <i>Proteobacteria</i>    | [54]      | 0.01       | 0.00 | 0.00 | 0.00  | 0.00 | 0.00 | 0.02  | 0.01  |
|                                          | <i>Rheinheimera</i>          | <i>Proteobacteria</i>    | [55]      | 0.13       | 0.00 | 0.00 | 0.01  | 0.00 | 0.00 | 0.00  | 0.00  |
|                                          | <i>Roseomonas</i>            | <i>Proteobacteria</i>    | [46]      | 0.01       | 0.00 | 0.00 | 0.00  | 0.00 | 0.00 | 0.03  | 0.01  |
|                                          | <i>Sandarakinorhabdus</i>    | <i>Proteobacteria</i>    | [46]      | 0.00       | 0.00 | 0.00 | 0.00  | 0.00 | 0.00 | 0.01  | 0.00  |
|                                          | <i>Shewanella</i>            | <i>Proteobacteria</i>    | [56]      | 0.09       | 0.00 | 0.00 | 0.00  | 0.00 | 0.01 | 0.05  | 0.01  |
|                                          | <i>SN8</i>                   | <i>Proteobacteria</i>    | [46]      | 0.01       | 0.00 | 0.00 | 0.00  | 0.00 | 0.00 | 0.00  | 0.00  |
|                                          | <i>Sphingobium</i>           | <i>Proteobacteria</i>    | [46]      | 0.01       | 0.00 | 0.00 | 0.00  | 0.00 | 0.00 | 0.00  | 0.00  |
|                                          | <i>Sphingomonas</i>          | <i>Proteobacteria</i>    | [46]      | 0.17       | 0.00 | 0.00 | 0.00  | 0.00 | 0.00 | 0.01  | 0.01  |
|                                          | <i>Sphingopyxis</i>          | <i>Proteobacteria</i>    | [46]      | 0.05       | 0.00 | 0.00 | 0.00  | 0.00 | 0.00 | 0.00  | 0.00  |
|                                          | <i>Sphingorhabdus</i>        | <i>Proteobacteria</i>    | [46]      | 0.03       | 0.00 | 0.00 | 0.00  | 0.00 | 0.00 | 0.02  | 0.01  |
|                                          | <i>Stenotrophomonas</i>      | <i>Proteobacteria</i>    | [46]      | 0.01       | 0.00 | 0.00 | 0.03  | 0.00 | 0.00 | 0.01  | 0.02  |
|                                          | <i>Thauera</i>               | <i>Proteobacteria</i>    | [46]      | 0.00       | 0.00 | 0.02 | 0.00  | 0.04 | 0.00 | 0.04  | 0.00  |
|                                          | <i>Thermomonas</i>           | <i>Proteobacteria</i>    | [46]      | 0.65       | 0.00 | 0.00 | 0.00  | 0.00 | 0.00 | 0.01  | 0.01  |
|                                          | <i>Zoogloea</i>              | <i>Proteobacteria</i>    | [54]      | 0.21       | 0.00 | 0.03 | 0.42  | 0.02 | 0.39 | 0.19  | 0.25  |

**Table S4 Reported the bacterial genera related to C cycle in the environment (continued)**

| Types                         | Genus                                         | Phylum                   | Reference | Sites (ID) |       |      |      |       |       |      |      |
|-------------------------------|-----------------------------------------------|--------------------------|-----------|------------|-------|------|------|-------|-------|------|------|
|                               |                                               |                          |           | A          | B     | C    | D    | E     | F     | G    | H    |
| Composite-functional bacteria | <i>Enhydrobacter</i>                          | <i>Proteobacteria</i>    | [55]      | 0.26       | 0.00  | 0.00 | 0.00 | 0.00  | 0.00  | 0.02 | 0.02 |
|                               | <i>Escherichia-Shigella</i>                   | <i>Proteobacteria</i>    | [46]      | 0.00       | 0.02  | 0.01 | 0.00 | 0.01  | 0.07  | 0.02 | 0.01 |
|                               | <i>Flavobacterium</i>                         | <i>Bacteroidota</i>      | [46, 57]  | 6.91       | 0.00  | 0.85 | 0.48 | 0.67  | 0.06  | 3.45 | 2.43 |
|                               | <i>Propionimonas</i>                          | <i>Actinobacteriota</i>  | [46, 58]  | 0.02       | 0.00  | 0.01 | 0.00 | 0.03  | 0.00  | 0.01 | 0.01 |
|                               | <i>Rhodoferrax</i>                            | <i>Proteobacteria</i>    | [13, 46]  | 0.22       | 0.00  | 5.11 | 0.02 | 6.63  | 0.00  | 1.37 | 0.49 |
|                               | <i>Acetoanaerobium</i>                        | <i>Firmicutes</i>        | [46]      | 0.01       | 0.00  | 0.01 | 0.01 | 0.02  | 0.02  | 0.01 | 0.05 |
|                               | <i>Acetobacterium</i>                         | <i>Firmicutes</i>        | [46]      | 0.00       | 0.00  | 0.02 | 0.01 | 0.03  | 0.03  | 0.01 | 0.06 |
|                               | <i>Acidaminobacter</i>                        | <i>Firmicutes</i>        | [46]      | 0.00       | 0.00  | 0.03 | 0.06 | 0.05  | 0.17  | 0.39 | 0.09 |
|                               | <i>Acidaminococcus</i>                        | <i>Firmicutes</i>        | [46]      | 0.01       | 0.00  | 0.00 | 0.02 | 0.00  | 0.04  | 0.00 | 0.00 |
|                               | <i>Aeromonas</i>                              | <i>Proteobacteria</i>    | [46]      | 0.33       | 0.04  | 0.04 | 0.03 | 0.03  | 0.10  | 0.10 | 0.05 |
|                               | <i>Anaerofilum</i>                            | <i>Firmicutes</i>        | [46]      | 0.00       | 0.00  | 0.00 | 0.00 | 0.01  | 0.00  | 0.00 | 0.00 |
|                               | <i>Anaerovorax</i>                            | <i>Firmicutes</i>        | [46]      | 0.01       | 0.00  | 0.31 | 0.38 | 0.73  | 0.56  | 0.69 | 0.22 |
|                               | <i>Bacteroides</i>                            | <i>Bacteroidota</i>      | [46]      | 0.03       | 0.02  | 0.96 | 0.66 | 1.27  | 0.71  | 0.36 | 0.16 |
|                               | <i>Bifidobacterium</i>                        | <i>Actinobacteriota</i>  | [46]      | 0.08       | 0.00  | 0.00 | 0.00 | 0.00  | 0.00  | 0.00 | 0.00 |
|                               | <i>Cloacibacterium</i>                        | <i>Bacteroidota</i>      | [46]      | 1.53       | 0.00  | 2.33 | 0.17 | 2.19  | 0.42  | 0.22 | 0.82 |
| Fermentative bacteria         | <i>Clostridium sensu stricto</i>              | <i>Firmicutes</i>        | [46]      | 0.10       | 0.35  | 0.25 | 0.47 | 0.43  | 8.36  | 0.08 | 0.12 |
|                               | <i>Desulfobulbus</i>                          | <i>Desulfobacterota</i>  | [46]      | 0.00       | 0.00  | 0.08 | 0.14 | 0.40  | 1.52  | 0.08 | 0.00 |
|                               | <i>Desulfomicrobium</i>                       | <i>Desulfobacterota</i>  | [46]      | 0.00       | 0.00  | 0.02 | 0.03 | 0.03  | 0.10  | 0.09 | 0.07 |
|                               | <i>Enterococcus</i>                           | <i>Firmicutes</i>        | [46]      | 0.00       | 0.02  | 0.01 | 0.00 | 0.02  | 0.03  | 0.00 | 0.01 |
|                               | <i>Formivibrio</i>                            | <i>Proteobacteria</i>    | [46]      | 0.00       | 0.00  | 0.00 | 0.06 | 0.00  | 0.13  | 0.00 | 0.00 |
|                               | <i>Fusobacterium</i>                          | <i>Fusobacteriota</i>    | [46]      | 0.00       | 0.00  | 0.00 | 0.00 | 0.01  | 0.00  | 0.00 | 0.00 |
|                               | <i>Lactobacillus</i>                          | <i>Firmicutes</i>        | [59]      | 0.07       | 1.42  | 0.02 | 0.01 | 0.10  | 0.05  | 0.03 | 0.06 |
|                               | <i>Lactococcus</i>                            | <i>Firmicutes</i>        | [46]      | 0.33       | 91.34 | 7.41 | 1.53 | 15.92 | 17.16 | 0.24 | 0.51 |
|                               | <i>Lautropia</i>                              | <i>Proteobacteria</i>    | [46]      | 0.00       | 0.00  | 0.00 | 0.00 | 0.00  | 0.00  | 0.01 | 0.00 |
|                               | <i>Leuconostoc</i>                            | <i>Firmicutes</i>        | [46]      | 0.09       | 0.43  | 0.05 | 0.00 | 0.19  | 0.02  | 0.01 | 0.00 |
|                               | <i>Megasphaera</i>                            | <i>Firmicutes</i>        | [46]      | 0.04       | 0.00  | 0.00 | 0.06 | 0.00  | 0.11  | 0.00 | 0.00 |
|                               | <i>Norank f Eubacterium coprostanoligenes</i> | <i>Firmicutes</i>        | [46]      | 0.00       | 0.00  | 0.02 | 0.00 | 0.03  | 0.00  | 0.00 | 0.00 |
|                               | <i>Norank f</i>                               | <i>Bacteroidota</i>      | [46]      | 0.02       | 0.00  | 0.00 | 0.00 | 0.00  | 0.00  | 0.00 | 0.00 |
|                               | <i>Flavobacteriaceae</i>                      |                          |           |            |       |      |      |       |       |      |      |
|                               | <i>Paludibacter</i>                           | <i>Bacteroidota</i>      | [60]      | 0.10       | 0.01  | 2.18 | 0.53 | 3.52  | 0.79  | 0.64 | 0.22 |
|                               | <i>Parabacteroides</i>                        | <i>Bacteroidota</i>      | [46]      | 0.01       | 0.00  | 0.00 | 0.00 | 0.00  | 0.00  | 0.00 | 0.00 |
|                               | <i>Pediococcus</i>                            | <i>Firmicutes</i>        | [61]      | 0.00       | 0.01  | 0.00 | 0.01 | 0.00  | 0.05  | 0.00 | 0.01 |
|                               | <i>Propionivibrio</i>                         | <i>Proteobacteria</i>    | [46]      | 0.01       | 0.00  | 0.00 | 0.14 | 0.02  | 0.19  | 0.01 | 0.01 |
|                               | <i>Proteocatella</i>                          | <i>Firmicutes</i>        | [46]      | 0.00       | 0.00  | 0.12 | 0.00 | 0.10  | 0.00  | 0.03 | 0.50 |
|                               | <i>Romboutsia</i>                             | <i>Firmicutes</i>        | [46]      | 0.05       | 0.00  | 0.00 | 0.00 | 0.00  | 0.01  | 0.00 | 0.00 |
|                               | <i>Sedimentibacter</i>                        | <i>Firmicutes</i>        | [46]      | 0.00       | 0.00  | 0.07 | 0.00 | 0.09  | 0.00  | 0.02 | 0.01 |
|                               | <i>Solobacterium</i>                          | <i>Firmicutes</i>        | [46]      | 0.01       | 0.00  | 0.00 | 0.00 | 0.00  | 0.00  | 0.00 | 0.00 |
|                               | <i>Streptococcus</i>                          | <i>Firmicutes</i>        | [59]      | 0.01       | 0.01  | 0.02 | 0.01 | 0.02  | 0.04  | 0.02 | 0.02 |
|                               | <i>Tolumonas</i>                              | <i>Proteobacteria</i>    | [46]      | 0.20       | 0.09  | 0.08 | 0.48 | 0.13  | 4.82  | 0.06 | 0.00 |
|                               | <i>Trichococcus</i>                           | <i>Firmicutes</i>        | [46]      | 0.10       | 0.19  | 1.35 | 0.28 | 3.08  | 0.47  | 1.86 | 8.19 |
|                               | <i>Veillonella</i>                            | <i>Firmicutes</i>        | [46]      | 0.01       | 0.00  | 0.78 | 2.03 | 0.63  | 10.96 | 0.02 | 0.00 |
|                               | <i>Victivallis</i>                            | <i>Verrucomicrobiota</i> | [46]      | 0.00       | 0.00  | 0.04 | 0.00 | 0.06  | 0.00  | 0.00 | 0.00 |
|                               | <i>Weissella</i>                              | <i>Firmicutes</i>        | [46]      | 0.00       | 0.52  | 0.28 | 0.01 | 0.42  | 0.04  | 0.03 | 0.05 |

Figure S1 Correlation analysis of different physicochemical parameters; red symbolizes a positive correlation, while blue represents a negative correlation; color intensity indicates correlation strength. Significant difference was denoted with \*\*P<0.01, \*P<0.05.

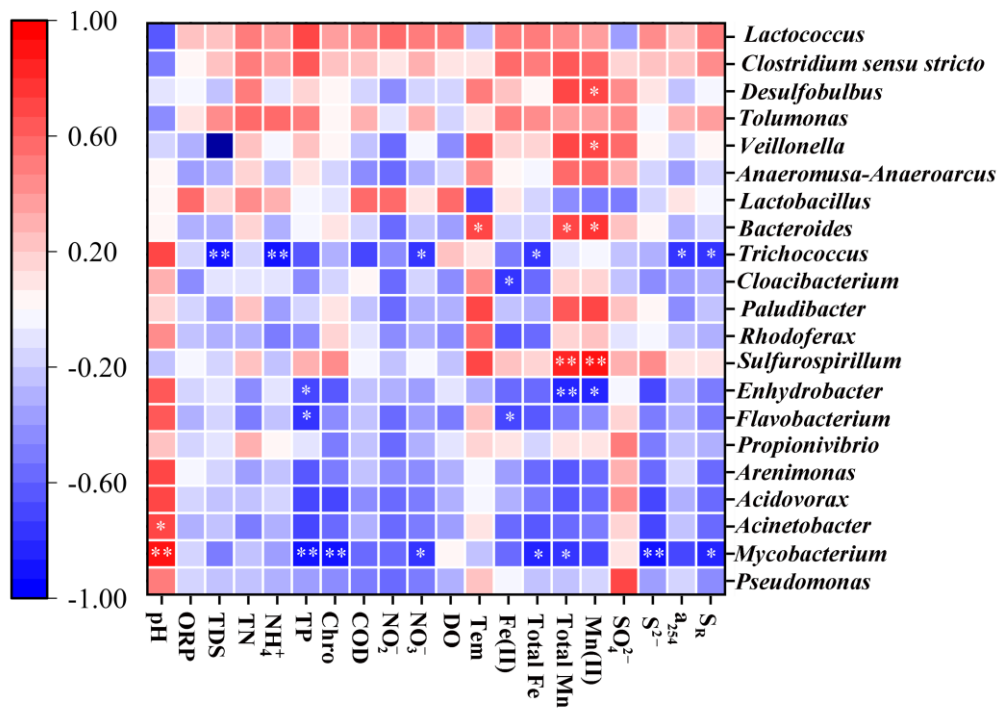

## References

1. Zhang, L.-M.; Liu, F.; Tan, W.-F.; Feng, X.-H.; Zhu, Y.-G.; He, J., Microbial DNA extraction and analyses of soil iron–manganese nodules. *Soil Biology and Biochemistry* **2008**, 40, (6), 1364-1369. <http://doi.org/10.1016/j.soilbio.2007.01.004>.
2. He, Z.; Wei, Z.; Zhang, Q.; Zou, J.; Pan, X., Metal oxyanion removal from wastewater using manganese-oxidizing aerobic granular sludge. *Chemosphere* **2019**, 236, 124353. <https://doi.org/10.1016/j.chemosphere.2019.124353>.
3. Zhang, Y.; Tang, Y.; Qin, Z.; Luo, P.; Ma, Z.; Tan, M.; Kang, H.; Huang, Z., A novel manganese oxidizing bacterium–Aeromonas hydrophila strain DS02: Mn (II) oxidation and biogenic Mn oxides generation. *Journal of hazardous materials* **2019**, 367, 539-545. <https://doi.org/10.1016/j.jhazmat.2019.01.012>.
4. Okano, K.; Furuta, S.; Ichise, S.; Miyata, N., Whole-genome sequences of two manganese (II)-oxidizing bacteria, Bosea sp. strain BIWAKO-01 and alphaproteobacterium strain U9-1i. *Genome Announcements* **2016**, 4, (6), e01309-16. <https://doi.org/10.1128/genomeA.01309-16>.
5. Song, H.; Peng, L.; Li, Z.; Deng, X.; Shao, J.; Gu, J.-d., Metal distribution and biological diversity of crusts in paddy fields polluted with different levels of cadmium. *Ecotoxicology and Environmental Safety* **2019**, 184, 109620. <https://doi.org/10.1016/j.ecoenv.2019.109620>.
6. Palmer, F. E.; Staley, J. T.; Murray, R. G. E.; Counsell, T.; Adams, J. B., Identification of manganese-oxidizing bacteria from desert varnish. *Geomicrobiology Journal* **1986**, 4, (4), 343-360. [10.1080/01490458609385943](https://doi.org/10.1080/01490458609385943).
7. Rajasekar, A.; Maruthamuthu, S.; Muthukumar, N.; Mohanan, S.; Subramanian, P.; Palaniswamy, N., Bacterial degradation of naphtha and its influence on corrosion. *Corrosion Science* **2005**, 47, (1), 257-271. <https://doi.org/10.1016/j.corsci.2004.05.016>.
8. Rosenberg, E.; DeLong, E. F.; Lory, S.; Stackebrandt, E.; Thompson, F., The prokaryotes: other major lineages of Bacteria and the Archaea. **2014**. <http://doi.org/10.1007/978-3-642-30197-1>.
9. Drewniak, L.; Stasiuk, R.; Uhrynowski, W.; Sklodowska, A., Shewanella sp. O23S as a driving agent of a system utilizing dissimilatory arsenate-reducing bacteria responsible for self-cleaning of water contaminated with arsenic. *International Journal of Molecular Sciences* **2015**, 16, (7), 14409-14427. <http://doi.org/10.3390/ijms160714409>.
10. Gao, H.; Obraztova, A.; Stewart, N.; Popa, R.; Fredrickson, J. K.; Tiedje, J. M.; Nealson, K. H.; Zhou, J., Shewanella loihica sp. nov., isolated from iron-rich microbial mats in the Pacific Ocean. *International Journal of Systematic and Evolutionary Microbiology* **2006**, 56, (8), 1911-1916. <http://doi.org/10.1099/ijs.0.64354-0>.
11. Francis, C. A.; Tebo, B. M., Enzymatic manganese (II) oxidation by metabolically dormant spores of diverse Bacillus species. *Applied and Environmental Microbiology* **2002**, 68, (2), 874-880. <http://doi.org/10.1128/AEM.68.2.874-880.2002>.
12. Kanso, S.; Greene, A. C.; Patel, B. K., Bacillus subterraneus sp. nov., an iron-and manganese-reducing bacterium from a deep subsurface Australian thermal aquifer. *International journal of systematic and evolutionary microbiology* **2002**, 52, (3), 869-874. <https://doi.org/10.1099/00207713-52-3-869>.
13. Finneran, K. T.; Johnsen, C. V.; Lovley, D. R., Rhodoferrax ferrireducens sp. nov., a psychrotolerant, facultatively anaerobic bacterium that oxidizes acetate with the reduction of Fe (III). *International Journal of Systematic and Evolutionary Microbiology* **2003**, 53, (3), 669-673. <http://doi.org/10.1099/ijs.0.02298-0>.
14. MacRae, J. D.; Lavine, I. N.; McCaffery, K. A.; Ricupero, K., Isolation and characterization of NP4, arsenate-reducing Sulfurospirillum, from Maine groundwater. *Journal of Environmental Engineering* **2007**, 133, (1), 81-88. [http://doi.org/10.1061/\(ASCE\)0733-9372\(2007\)133:1\(81\)](http://doi.org/10.1061/(ASCE)0733-9372(2007)133:1(81)).
15. Sudek, L. A.; Wanger, G.; Templeton, A. S.; Staudigel, H.; Tebo, B. M., Submarine basaltic glass colonization by the heterotrophic Fe (II)-oxidizing and siderophore-producing deep-sea bacterium Pseudomonas stutzeri VS-10: The potential role of basalt in enhancing growth. *Frontiers in Microbiology* **2017**, 8, 363. <http://doi.org/10.3389/fmicb.2017.00363>.
16. Zhang, L.; Sun, H.; Zhang, X.-x.; Ren, H.; Ye, L., High diversity of potential nitrate-reducing Fe (II)-oxidizing bacteria enriched from activated sludge. *Applied microbiology and biotechnology* **2018**, 102, (11), 4975-4985. <https://doi.org/10.1007/s00253-018-8961-1>.
17. Achenbach, L. A.; Michaelidou, U.; Bruce, R. A.; Fryman, J.; Coates, J. D., Dechloromonas agitata gen. nov., sp. nov. and



- Dechlorosoma suillum gen. nov., sp. nov., two novel environmentally dominant (per)chlorate-reducing bacteria and their phylogenetic position. *International Journal of Systematic and Evolutionary Microbiology* **2001**, 51, (2), 527-533. <https://doi.org/10.1099/00207713-51-2-527>.
18. Hedrich, S.; Schlömann, M.; Johnson, D. B., The iron-oxidizing proteobacteria. *Microbiology* **2011**, 157, (6), 1551-1564. <http://doi.org/10.1099/mic.0.045344-0>.
  19. Emerson, D.; Rentz, J. A.; Lilburn, T. G.; Davis, R. E.; Aldrich, H.; Chan, C.; Moyer, C. L., A novel lineage of proteobacteria involved in formation of marine Fe-oxidizing microbial mat communities. *PloS one* **2007**, 2, (8), e667. <http://doi.org/10.1371/journal.pone.0000667>.
  20. Pecheritsyna, S. A.; Rivkina, E. M.; Akimov, V. N.; Shcherbakova, V. A., Desulfovibrio arcticus sp. nov., a psychrotolerant sulfate-reducing bacterium from a cryopeg. *International Journal of Systematic and Evolutionary Microbiology* **2012**, 62, (1), 33-37. <https://doi.org/10.1099/ij.s.0.021451-0>.
  21. DJ, K. N.; Staley, J.; Garrity, G., Bergeys manual of systematic bacteriology. volume two: the Proteobacteria. Part C: the Alpha-, Beta-, Delta and Epsilonproteobacteria. *Bergey's Manual of Systematic Bacteriology, Second Edition, Volume Two: The Proteobacteria, Part C: The Alpha-, Beta-, Delta-, and Epsilonproteobacteria* **2005**, 567-71. <http://doi.org/10.1007/0-387-28022-7>.
  22. Lovley, D. R., Dissimilatory fe (iii) and mn (iv) reduction. *Microbiological reviews* **1991**, 55, (2), 259-287. [http://doi.org/10.1007/978-3-642-30141-4\\_69](http://doi.org/10.1007/978-3-642-30141-4_69).
  23. Chen, R.; Oceanography, T. I. o.; Administration, S. O., The planktonic holocyprifimes (Ostracoda) from tropical waters of the Western Pacific Ocean. In China Ocean Press Beijing: 1984; pp 64-139.
  24. Sánchez-Andrea, I.; Stams, A. J.; Hedrich, S.; Nancucheo, I.; Johnson, D. B., Desulfosporosinus acididurans sp. nov.: an acidophilic sulfate-reducing bacterium isolated from acidic sediments. *Extremophiles* **2015**, 19, (1), 39-47. <http://doi.org/10.1007/s00792-014-0701-6>.
  25. Rattanapan, C.; Kantachote, D.; Yan, R.; Boonsawang, P., Hydrogen sulfide removal using granular activated carbon biofiltration inoculated with Alcaligenes faecalis T307 isolated from concentrated latex wastewater. *International Biodeterioration & Biodegradation* **2010**, 64, (5), 383-387. <https://doi.org/10.1016/j.ibiod.2010.04.005>.
  26. Friedrich, C. G.; Rother, D.; Bardischewsky, F.; Quentmeier, A.; Fischer, J., Oxidation of reduced inorganic sulfur compounds by bacteria: emergence of a common mechanism? *Applied and environmental microbiology* **2001**, 67, (7), 2873-2882. <http://doi.org/10.1128/AEM.67.7.2873-2882.2001>.
  27. Lee, D.-J.; Wong, B.-T.; Adav, S. S., Azoarcus taiwanensis sp. nov., a denitrifying species isolated from a hot spring. *Applied Microbiology and Biotechnology* **2014**, 98, (3), 1301-1307. <http://doi.org/10.1007/s00253-013-4976-9>.
  28. Anandham, R.; Indira Gandhi, P.; Kwon, S. W.; Sa, T. M.; Kim, Y. K.; Jee, H. J., Mixotrophic metabolism in Burkholderia kururiensis subsp. thiooxydans subsp. nov., a facultative chemolithoautotrophic thiosulfate oxidizing bacterium isolated from rhizosphere soil and proposal for classification of the type strain of Burkholderia kururiensis as Burkholderia kururiensis subsp. kururiensis subsp. nov. *Archives of Microbiology* **2009**, 191, (12), 885-894. [10.1007/s00203-009-0517-4](http://doi.org/10.1007/s00203-009-0517-4).
  29. Li, M.; Fang, A.; Yu, X.; Zhang, K.; He, Z.; Wang, C.; Peng, Y.; Xiao, F.; Yang, T.; Zhang, W.; Zheng, X.; Zhong, Q.; Liu, X.; Yan, Q., Microbially-driven sulfur cycling microbial communities in different mangrove sediments. *Chemosphere* **2021**, 273, 128597. <https://doi.org/10.1016/j.chemosphere.2020.128597>.
  30. Mason, J.; Kelly, D. P., Thiosulfate oxidation by obligately heterotrophic bacteria. *Microbial ecology* **1988**, 15, (2), 123-134. <http://doi.org/10.1007/BF02011707>.
  31. Han, C.; Kotsyurbenko, O.; Chertkov, O.; Held, B.; Lapidus, A.; Nolan, M.; Lucas, S.; Hammon, N.; Deshpande, S.; Cheng, J.-F., Complete genome sequence of the sulfur compounds oxidizing chemolithoautotroph Sulfuricurvum kujiense type strain (YK-1T). *Standards in genomic sciences* **2012**, 6, (1), 94-103. <http://doi.org/10.4056/sigs.2456004>.
  32. Grote, J.; Schott, T.; Bruckner, C. G.; Glöckner, F. O.; Jost, G.; Teeling, H.; Labrenz, M.; Jürgens, K., Genome and physiology of a model Epsilonproteobacterium responsible for sulfide detoxification in marine oxygen depletion zones. *Proceedings of the National Academy of Sciences* **2012**, 109, (2), 506-510. <http://doi.org/10.1073/pnas.1111262109>.

33. Frigaard, N.-U.; Dahl, C., Sulfur metabolism in phototrophic sulfur bacteria. *Advances in microbial physiology* **2008**, 54, 103-200. [http://doi.org/10.1016/S0065-2911\(08\)00002-7](http://doi.org/10.1016/S0065-2911(08)00002-7).
34. Munn, C. B., Marine Microbiology: Ecology & Applications Third Edition. **2019**. <https://doi.org/10.1201/9780429061042>.
35. Müller, N.; Scherag, F. D.; Pester, M.; Schink, B., *Bacillus stamsii* sp. nov., a facultatively anaerobic sugar degrader that is numerically dominant in freshwater lake sediment. *Systematic and applied microbiology* **2015**, 38, (6), 379-389. <http://doi.org/10.1016/j.syapm.2015.06.004>.
36. Pérez-Ibarra, B. M.; Flores, M. E.; García-Varela, M., Isolation and characterization of *Bacillus thioparus* sp. nov., chemolithoautotrophic, thiosulfate-oxidizing bacterium. *FEMS Microbiology Letters* **2007**, 271, (2), 289-296. [10.1111/j.1574-6968.2007.00729.x](http://doi.org/10.1111/j.1574-6968.2007.00729.x).
37. Horn, M. A.; Ihssen, J.; Matthies, C.; Schramm, A.; Acker, G.; Drake, H. L., *Dechloromonas denitrificans* sp. nov., *Flavobacterium denitrificans* sp. nov., *Paenibacillus anaericanus* sp. nov. and *Paenibacillus terrae* strain MH72, N<sub>2</sub>O-producing bacteria isolated from the gut of the earthworm *Aporrectodea caliginosa*. *International journal of systematic and evolutionary microbiology* **2005**, 55, (3), 1255-1265. <http://doi.org/10.1099/ijs.0.63484-0>.
38. Eisenmann, E.; Beuerle, J.; Sulger, K.; Kroneck, P. M.; Schumacher, W., Lithotrophic growth of *Sulfurospirillum deleyianum* with sulfide as electron donor coupled to respiratory reduction of nitrate to ammonia. *Archives of microbiology* **1995**, 164, (3), 180-185. <http://doi.org/10.1007/BF02529969>.
39. Sorokin, D.; Tourova, T.; Muyzer, G., Isolation and characterization of two novel alkalitolerant sulfidogens from a Thiopaq bioreactor, *Desulfonatronum alkalitolerans* sp. nov., and *Sulfurospirillum alkalitolerans* sp. nov. *Extremophiles* **2013**, 17, (3), 535-543. <https://doi.org/10.1007/s00792-013-0538-4>.
40. Mino, S.; Kudo, H.; Arai, T.; Sawabe, T.; Takai, K.; Nakagawa, S., *Sulfurovum aggregans* sp. nov., a hydrogen-oxidizing, thiosulfate-reducing chemolithoautotroph within the Epsilonproteobacteria isolated from a deep-sea hydrothermal vent chimney, and an emended description of the genus *Sulfurovum*. *International journal of systematic and evolutionary microbiology* **2014**, 64, (Pt\_9), 3195-3201. <http://doi.org/10.1099/ijs.0.065094-0>.
41. Nakagawa, S.; Takaki, Y.; Shimamura, S.; Reysenbach, A.-L.; Takai, K.; Horikoshi, K., Deep-sea vent  $\epsilon$ -proteobacterial genomes provide insights into emergence of pathogens. *Proceedings of the National Academy of Sciences* **2007**, 104, (29), 12146-12150.
42. Kharrat, H.; Karray, F.; Bartoli, M.; Ben Hnia, W.; Mhiri, N.; Fardeau, M.-L.; Bennour, F.; Kamoun, L.; Alazard, D.; Sayadi, S., *Desulfobulbus aggregans* sp. nov., a novel sulfate reducing bacterium isolated from marine sediment from the Gulf of Gabes. *Current microbiology* **2017**, 74, (4), 449-454. <http://doi.org/10.1007/s00284-017-1211-4>.
43. Macy, J. M.; Santini, J. M.; Pauling, B. V.; O'Neill, A. H.; Sly, L. I., Two new arsenate/sulfate-reducing bacteria: mechanisms of arsenate reduction. *Archives of Microbiology* **2000**, 173, (1), 49-57. [10.1007/s002030050007](http://doi.org/10.1007/s002030050007).
44. Rosenberg, E.; DeLong, E. F.; Lory, S.; Stackebrandt, E.; Thompson, F., *The prokaryotes: deltaproteobacteria and epsilonproteobacteria*. Springer: 2014.
45. Leonardo, M. R.; Moser, D. P.; Barbieri, E.; Brantner, C. A.; MacGregor, B. J.; Paster, B. J.; Stackebrandt, E.; Nealson, K. H., *Shewanella pealeana* sp. nov., a member of the microbial community associated with the accessory nidamental gland of the squid *Loligo pealei*. *International Journal of Systematic and Evolutionary Microbiology* **1999**, 49, (4), 1341-1351. <http://doi.org/10.1099/00207713-49-4-1341>.
46. Garrity, G. M.; Bell, J. A.; Lilburn, T., Class I. Alphaproteobacteria class. nov. In *Bergey's Manual® of Systematic Bacteriology: Volume Two The Proteobacteria Part C The Alpha-, Beta-, Delta-, and Epsilonproteobacteria*, Brenner, D. J.; Krieg, N. R.; Staley, J. T., Eds. Springer US: Boston, MA, 2005; pp 1-574.
47. Makk, J.; Homonnay, Z. G.; Keki, Z.; Nemes-Barnas, K.; Marialigeti, K.; Schumann, P.; Toth, E. M., *Arenimonas subflava* sp. nov., isolated from a drinking water network, and emended description of the genus *Arenimonas*. *International Journal of Systematic and Evolutionary Microbiology* **2015**, 65, (Pt\_6), 1915-1921. <http://doi.org/10.1099/ijs.0.000201>.
48. Chen, M.-H.; Sheu, S.-Y.; James, E. K.; Young, C.-C.; Chen, W.-M., *Azoarcusolearius* sp. nov., a nitrogen-fixing bacterium isolated from oil-contaminated soil. *International Journal of Systematic and Evolutionary Microbiology* **2013**, 63, (Pt\_10),

3755-3761. <https://doi.org/10.1099/ijls.0.050609-0>.

49. Bergey, D. H., *Bergey's manual of determinative bacteriology*. Lippincott Williams & Wilkins: 1994.
50. Oren, A.; Xu, X.-W., The family hyphomicrobiaceae. *The prokaryotes* **2014**, 247, 281.
51. Kang, H.; Kim, H.; Joung, Y.; Jang, T. Y.; Joh, K., Ferruginibacter paludis sp. nov., isolated from wetland freshwater, and emended descriptions of Ferruginibacter lapsinans and Ferruginibacter alkalilentus. *International Journal of Systematic and Evolutionary Microbiology* **2015**, 65, (Pt\_8), 2635-2639. <http://doi.org/10.1099/ijls.0.000311>.
52. Weiner, R. M.; Melick, M.; O'Neill, K.; Quintero, E., Hyphomonas adhaerens sp. nov., Hyphomonas johnsonii sp. nov. and Hyphomonas rosenbergii sp. nov., marine budding and prosthecate bacteria. *International journal of systematic and evolutionary microbiology* **2000**, 50, (2), 459-469. <http://doi.org/10.1099/00207713-50-2-459>.
53. Tsukamura, M.; Mizuno, S.; Tsukamura, S., Numerical Analysis of Rapidly Growing, Scotochromogenic Mycobacteria, Including Mycobacterium obuense sp. nov., nom. rev., Mycobacterium rhodesiae sp. nov., nom. rev., Mycobacterium aichiense sp. nov., nom. rev., Mycobacterium chubuense sp. nov., nom. rev., and Mycobacterium tokaiense sp. nov., nom. rev. *International Journal of Systematic and Evolutionary Microbiology* **1981**, 31, (3), 263-275. <http://doi.org/10.1099/00207713-31-3-263>.
54. Kim, S.-J.; Ahn, J.-H.; Lee, T.-H.; Weon, H.-Y.; Hong, S.-B.; Seok, S.-J.; Whang, K.-S.; Kwon, S.-W., Reyranellassoli sp. nov., isolated from forest soil, and emended description of the genus Reyranelia Pagnier et al. 2011. *International journal of systematic and evolutionary microbiology* **2013**, 63, (Pt\_9), 3164-3167. <http://doi.org/10.1099/ijls.0.045922-0>.
55. Brettar, I.; Christen, R.; Höfle, M. G., Rheinheimera baltica gen. nov., sp. nov., a blue-coloured bacterium isolated from the central Baltic Sea. *International Journal of Systematic and Evolutionary Microbiology* **2002**, 52, (5), 1851-1857. <https://doi.org/10.1099/00207713-52-5-1851>.
56. Zhang, J.; Burgess, J. G., Shewanella electrodiffila sp. nov., a psychrotolerant bacterium isolated from Mid-Atlantic Ridge deep-sea sediments. *International Journal of Systematic and Evolutionary Microbiology* **2015**, 65, (Pt\_9), 2882-2889. <http://doi.org/10.1099/ijls.0.000345>.
57. Tamaki, H.; Hanada, S.; Kamagata, Y.; Nakamura, K.; Nomura, N.; Nakano, K.; Matsumura, M., Flavobacterium limicola sp. nov., a psychrophilic, organic-polymer-degrading bacterium isolated from freshwater sediments. *International Journal of Systematic and Evolutionary Microbiology* **2003**, 53, (2), 519-526. <http://doi.org/10.1099/ijls.0.02369-0>.
58. Sierra-Garcia, I. N.; de Oliveira, V. M., Microbial hydrocarbon degradation: efforts to understand biodegradation in petroleum reservoirs. *Biodegradation-engineering and technology* **2013**, 10, 55920. <http://doi.org/10.5772/55920>.
59. Courtin, P.; Rul, F., Interactions between microorganisms in a simple ecosystem: yogurt bacteria as a study model. *Le Lait* **2004**, 84, (1-2), 125-134. <http://doi.org/10.1051/lait:2003031>.
60. Ueki, A.; Akasaka, H.; Suzuki, D.; Ueki, K., Paludibacter propionigenes gen. nov., sp. nov., a novel strictly anaerobic, Gram-negative, propionate-producing bacterium isolated from plant residue in irrigated rice-field soil in Japan. *International journal of systematic and evolutionary microbiology* **2006**, 56, (1), 39-44. <http://doi.org/10.1099/ijls.0.63896-0>.
61. Konings, W.; Kuipers, O.; Kuipers, O., *Lactic acid bacteria: genetics, metabolism and applications*. Springer Science & Business Media: 1999.
